# Supplementary material
Source: PubMed Central journal article supplement (PMC11028258)
Supplement: 262_2019_2415_MOESM1_ESM.pdf [file 262_2019_2415_MOESM1_ESM.pdf]

### Supplementary Materials

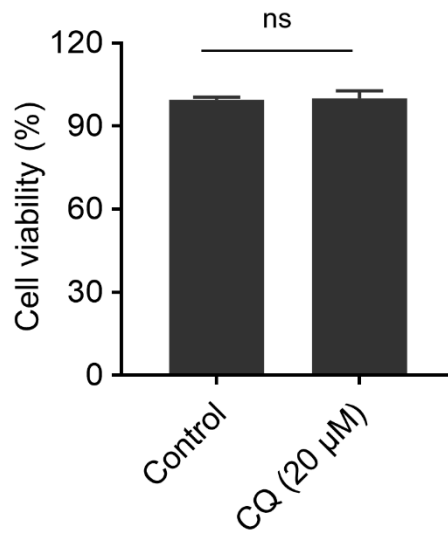

**Figure S1.** Cell viability examined by MTT assay. Hep-2 cells were treated with CQ (20 μM) for 48 h, and the cell viability was detected by MTT assay. Data are shown as means ± SD, n = 3 independent replicates from a single experiment. ns, no significant difference.

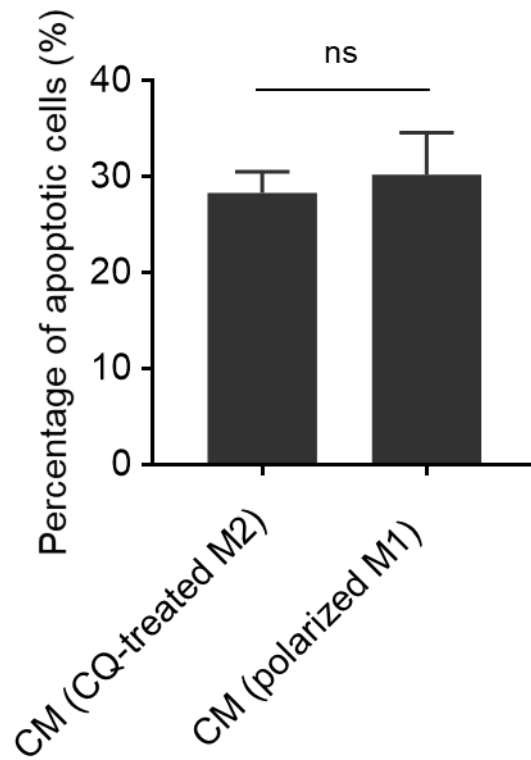

**Figure S2.** Hep-cells were treated with CDDP and conditioned medium (CM) from CQ-treated M2 macrophages or LPS and IFN- $\gamma$  induced polarized M1 macrophages. The cell apoptosis was detected via flow cytometry 48 h post incubation. Data are shown as means  $\pm$  SD, n = 3 independent replicates from a single experiment. ns, no significant difference.

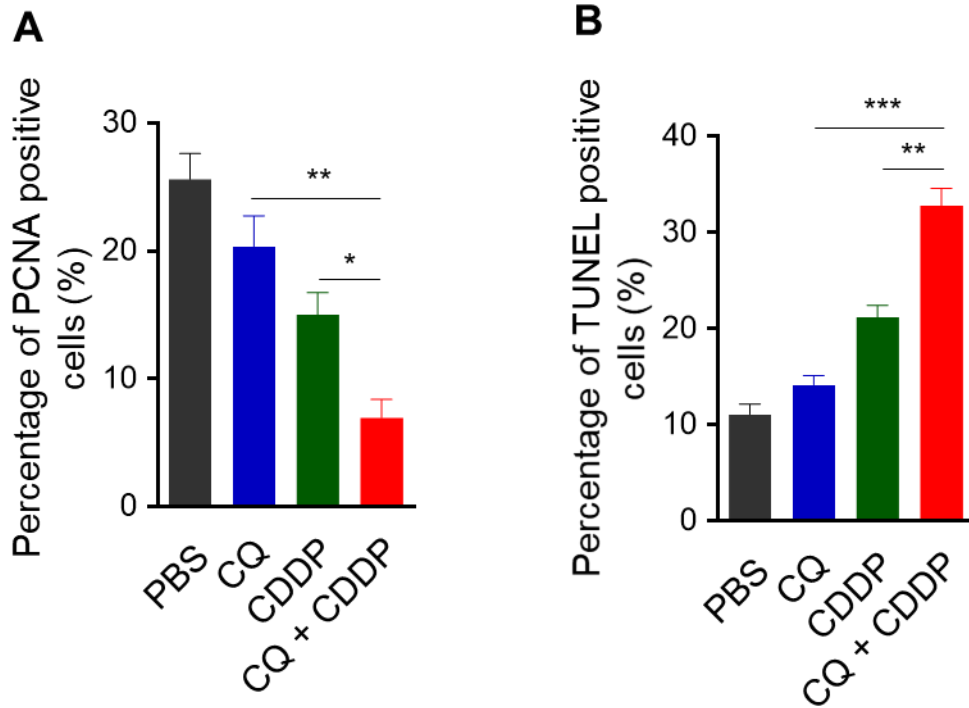

**Figure S3.** The total cells and PCNA (or TUNEL) positive cells were counted according to immunohistochemical and immunofluorescent staining. The percentages of PCNA positive (A) and TUNEL positive cells were calculated.
